# Supplementary material for: An Empirical Comparative Assessment of Inter-Rater Agreement of Binary Outcomes and Multiple Raters
Source: MDPI journal article supplement (doi:10.3390/sym14020262), 2022-01-29
Supplement: s1 [file s1]

Archive with 1 entries (1 files):
- symmetry-1469961-supplementary.pdf
